# Supplementary material
Source: HighWire-hosted journal article supplement (https://oem.bmj.com/content/77/7/454)
Supplement: inline-supplementary-material-1 [file inline-supplementary-material-1.pdf]

**Supplemental Table 1. Profession and gender for the OHS consultants**

|                                         | PSI<br>n (%) | CAU<br>n (%) |
|-----------------------------------------|--------------|--------------|
| Female                                  | 21           | 19           |
| Male                                    | 5            | 3            |
| Nurses and ergonomists                  | 16           | 17           |
| Behavioral scientists and psychologists | 8            | 4            |
| Physician                               | 2            | 1            |

PSI = Problem-Solving Intervention; CAU = Care As Usual

In Sweden, the employer pays for the Occupational Health Services. Just below 60% of all employees in Sweden have access to OHS.
