# Supplementary material
Source: HighWire-hosted journal article supplement (https://oem.bmj.com/content/77/7/454)
Supplement: inline-supplementary-material-2 [file inline-supplementary-material-2.pdf]

Supplemental Table 2. SMS messages were sent to the participants every fourth week over the follow-up period with start one month after the baseline questionnaire was completed.

| Question |                                                                                                                  | Response format                                                 |
|----------|------------------------------------------------------------------------------------------------------------------|-----------------------------------------------------------------|
| 1        | Are you currently on sick leave?                                                                                 | no sick leave, 25%, 50%, 75% or 100% sick leave                 |
| 2        | Over the last eight weeks, have you worked your ordinary working hours for a consecutive period of four weeks?   | yes or no. This item was developed for this study.              |
| 3        | Over the last four weeks, how much did your health problems affect your performance while you were working?      | 0 to 10; higher numbers indicate higher performance limitations |
| 4        | How many days over the last four weeks have you been on sickness absence (part- or full-time)?                   | 0 – 28 days                                                     |
| 5a       | Have you been stressed lately?                                                                                   | 1 to 5; higher values indicate more stress                      |
| 5b       | Over the last four weeks, how much did work environment problems affect your performance while you were working? | 0 to 10, higher numbers indicate higher performance limitations |

Question 5a and 5b were alternated, so each question was asked every other four week-period.
