# Supplementary material
Source: HighWire-hosted journal article supplement (https://oem.bmj.com/content/77/7/454)
Supplement: inline-supplementary-material-4 [file inline-supplementary-material-4.pdf]

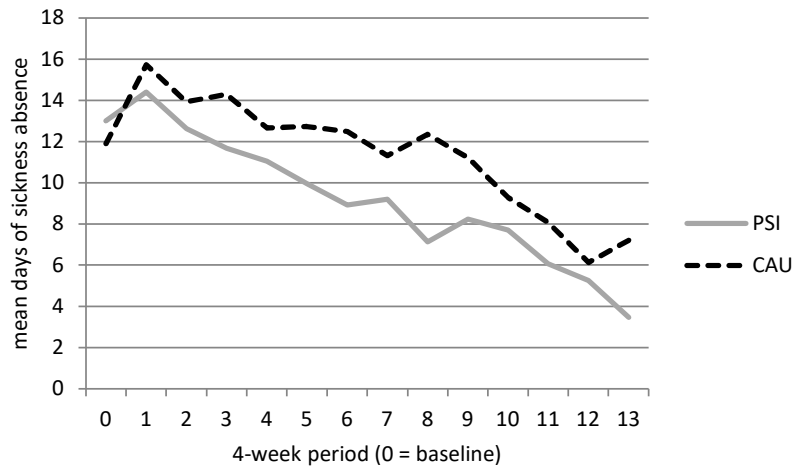

**Supplemental Figure 1.** Mean number of days of sickness absence per month for the self-registered sickness absence for the one-year follow-up period. Note that this data includes both short-term (up to 14 days) and self-registered long-term sickness absence. PSI = Problem-Solving Intervention; CAU = Care As Usual
