# Supplementary material
Source: HighWire-hosted journal article supplement (https://oem.bmj.com/content/77/7/454)
Supplement: inline-supplementary-material-5 [file inline-supplementary-material-5.pdf]

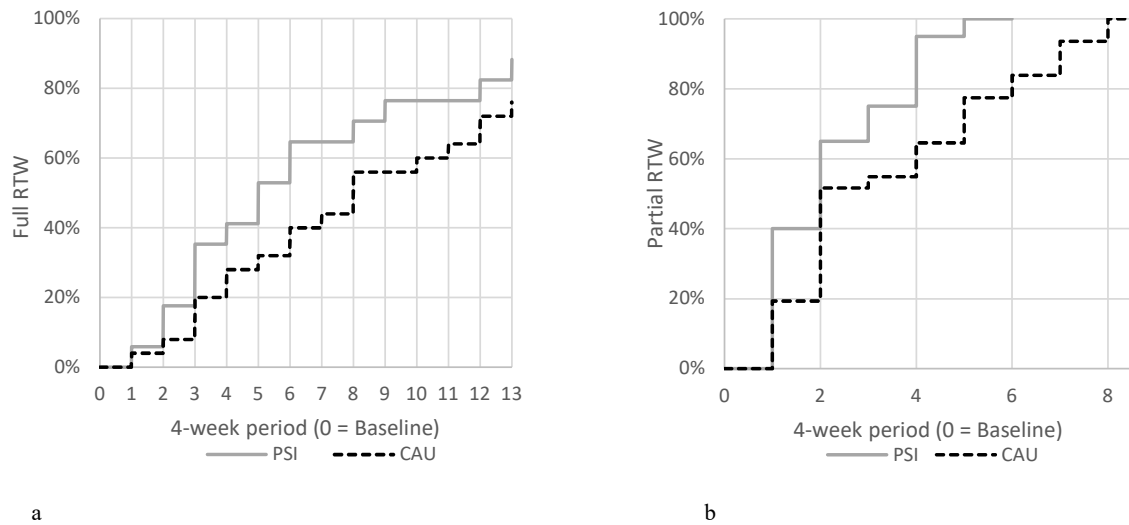

**Supplemental Figure 2.** (a) Kaplan-Meier curve showing the part of the groups that had fully returned to work measured over the 12-month follow-up period. (b) Kaplan-Meier curve showing the part of the groups that partially returned to work measured over the 12-month follow-up period. PSI = Problem-Solving Intervention; CAU = Care As Usual
