# Supplementary material
Source: HighWire-hosted journal article supplement (https://oem.bmj.com/content/77/7/454)
Supplement: inline-supplementary-material-7 [file inline-supplementary-material-7.pdf]

Supplemental Table 5. Wilcoxon Signed-Rank and Mann-Whitney U test for baseline compared to 6 resp. 12 months for PSI and CAU.

|                                  |                | Baseline – 6 months |       | Baseline-12 months |       |
|----------------------------------|----------------|---------------------|-------|--------------------|-------|
|                                  |                | Z                   | p     | Z                  | p     |
| S-ED                             |                |                     |       |                    |       |
|                                  | PSI            | -1.41               | 0.157 | -3.64              | <.001 |
|                                  | CAU            | -3.43               | 0.001 | -3.51              | <.001 |
|                                  | Between groups | -1.26               | 0.206 | -1.34              | 0.182 |
| Future work ability <sup>1</sup> |                |                     |       |                    |       |
|                                  | PSI            | <.001               | 1.000 | -2.49              | 0.013 |
|                                  | CAU            | -0.19               | 0.847 | -0.21              | 0.833 |
|                                  | Between groups | 0.07                | 0.942 | -1.80              | 0.071 |
| Presenteeism                     |                |                     |       |                    |       |
|                                  | PSI            | -2.99               | 0.003 | -2.36              | 0.018 |
|                                  | CAU            | -3.27               | 0.001 | -3.19              | 0.001 |
|                                  | Between groups | 0.31                | 0.759 | 0.31               | 0.755 |

PSI = Problem-Solving Intervention; CAU = Care As Usual; S-ED = Self-reported Exhaustion Disorder;

<sup>1</sup>Item from the Work Ability Index regarding employees' own prognosis of their work ability in two years' time.
